# Supplementary material for: Imatinib and spironolactone suppress hepcidin expression
Source: PubMed Central journal article supplement — Haematologica. 2017 Apr 6;102(7):1173–84. doi: 10.3324/haematol.2016.162917 (PMC5566021; doi:10.3324/haematol.2016.162917), 2017-07
Supplement: 2016.162917.Mleczko-Sanecka_SUPPL.pdf [file 2016.162917.Mleczko-Sanecka_SUPPL.pdf]

## Imatinib and spironolactone suppress hepcidin expression

Katarzyna Mleczko-Sanecka,<sup>1,2\*</sup> Ana Rita da Silva,<sup>1\*</sup> Debora Call,<sup>1</sup> Joana Neves,<sup>1</sup> Nikolai Schmeer,<sup>1</sup> Georg Damm,<sup>3,4</sup> Daniel Seehofer<sup>3,4</sup> and Martina U. Muckenthaler<sup>1</sup>

<sup>1</sup>Department of Pediatric Oncology, Hematology and Immunology, University of Heidelberg and Molecular Medicine Partnership Unit, Heidelberg, Germany; <sup>2</sup>International Institute of Molecular and Cell Biology, Warsaw, Poland; <sup>3</sup>Department of Hepatobiliary Surgery and Visceral Transplantation, University of Berlin, Germany and <sup>4</sup>Department of Hepatobiliary Surgery and Visceral Transplantation, University of Leipzig, Germany

*\*KM-S, ARdS and DC contributed equally to this manuscript.*

©2017 Ferrata Storti Foundation. This is an open-access paper. doi:10.3324/haematol.2016.162917

Received: December 27, 2016.

Accepted: April 5, 2017.

Pre-published: April 6, 2017.

Correspondence: [martina.muckenthaler@med.uni-heidelberg.de](mailto:martina.muckenthaler@med.uni-heidelberg.de) or [kmsanecka@iimcb.gov.pl](mailto:kmsanecka@iimcb.gov.pl)

---

## Supplementary Figure

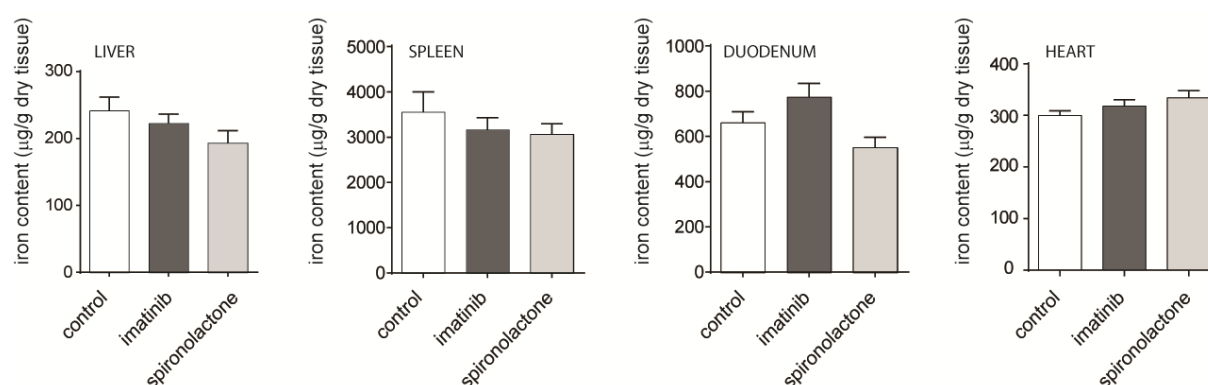

Supplementary Figure 1. Non-heme iron content ( $\mu\text{g iron/g dry tissue}$ ) in organs of mice administrated with drugs and respective controls. All data are presented as a mean  $\pm$  SEM from 10 mice per treatment group.

## Supplementary Tables

| Drug                                              | Supplier                                                                  | Catalog number | Concentration in culture           |
|---------------------------------------------------|---------------------------------------------------------------------------|----------------|------------------------------------|
| Acetylsalicylic acid (Aspirin)                    | Sigma-Aldrich (Steinheim, Germany)                                        | 50-78-2        | 500 $\mu\text{M}$ <sup>1</sup>     |
| Amiloride hydrochloride hydrate                   | Sigma-Aldrich (Steinheim, Germany)                                        | 2016-88-8      | 50-200 $\mu\text{M}$               |
| Captopril                                         | Sigma-Aldrich (Steinheim, Germany)                                        | 62571-86-2     | 10 $\mu\text{M}$                   |
| Compound 2                                        | Provided by prof. Olaf Witt, described in Krennhrubel et al. <sup>2</sup> |                | 25 $\mu\text{M}$                   |
| Diclofenac sodium salt                            | Sigma-Aldrich (Steinheim, Germany)                                        | 15307-79-6     | 50-200 $\mu\text{M}$               |
| Entinostat (MS-275)                               | Calbiochem, San Diego, CA                                                 | 209783-80-2    | 1 $\mu\text{M}$                    |
| Imatinib Mesylate                                 | Selleck Chemicals (Houston, TX, USA)                                      | 220127-57-1    | 1-10 $\mu\text{M}$                 |
| Lovastatin                                        | Sigma-Aldrich (Steinheim, Germany)                                        | 75330-75-5     | 10 $\mu\text{M}$                   |
| Panobinostat (LBH 589)                            | Selleck Chemicals (Houston, TX, USA)                                      | 404950-80-7    | 100 nM <sup>3</sup>                |
| Pentoxifyllin                                     | Sigma-Aldrich (Steinheim, Germany)                                        | 64.93-05-6     | 100 $\mu\text{M}$ <sup>4</sup>     |
| Progesterone                                      | Sigma-Aldrich (Steinheim, Germany)                                        | 57-83-0        | 1 $\mu\text{M}$                    |
| Ranitidine hydrochloride                          | Sigma-Aldrich (Steinheim, Germany)                                        | 666357-59-3    | 10 $\mu\text{M}$                   |
| Spironolacton                                     | Sigma-Aldrich (Steinheim, Germany)                                        | 52-01-7        | 10-50 $\mu\text{M}$                |
| Trapoxin A                                        | Calbiochem, San Diego, CA                                                 | 133155-89-2    | 80 nM                              |
| Vorinostat (SAHA)                                 | Calbiochem, San Diego, CA                                                 | 149647-78-9    | 0.5-1.5 $\mu\text{M}$ <sup>5</sup> |
| Dicumarol [3,3'-Methylene-bis(4-hydroxycoumarin)] | Sigma-Aldrich (Steinheim, Germany)                                        | 66-76-2        | 100 $\mu\text{M}$                  |
| Eplerenone                                        | Sigma-Aldrich (Steinheim, Germany)                                        | E6657          | 0.5-20 $\mu\text{M}$               |
| Qercetin                                          | Sigma-Aldrich (Steinheim, Germany)                                        | Q4951          | 12.5-50 $\mu\text{M}$              |

Table S1. List of pharmaceutical agents used in this study.

| siRNA catalog number | gene symbol | gene accession numbers |
|----------------------|-------------|------------------------|
| MU-006147-00         | CHRNE       | NM_000080              |
| MU-003109-02         | CSF1R       | NM_005211              |
| MU-003129-01         | FER         | NM_005246              |
| MU-009792-00         | GPLD1       | NM_001503              |
| MU-005616-01         | GRM1        | NM_000838              |
| MU-005623-01         | GRM8        | NM_000845              |
| MU-003496-00         | HDAC3       | NM_003883              |
| MU-004072-00         | HDAC10      | NM_032019              |
| MU-009811-01         | HMGCR       | NM_000859              |
| MU-008034-00         | MPRG        | NM_017705              |
| MU-003158-01         | MUSK        | NM_005592              |
| MU-019849-00         | MYST3       | NM_006766              |
| MU-006334-00         | NQO2        | NM_000904              |
| MU-005684-01         | OPRK1       | NM_000912              |
| MU-008409-00         | OSBPL10     | NM_017784              |
| MU-003163-02         | PDGFRB      | NM_002609              |
| MU-008820-01         | PLA2G4B     | NM_005090              |
| MU-008485-00         | PLCB3       | NM_000932              |
| MU-004201-00         | PLCE1       | NM_016341              |
| MU-008339-00         | PLCG2       | NM_002661              |
| MU-005714-00         | PTGER4      | NM_000958              |
| MU-004691-01         | PTGIS       | NM_000961              |
| MU-003688-02         | P2RY2       | NM_002564              |
| MU-003438-01         | RARB        | NM_000965              |
| MU-007439-00         | SLCO1A2     | NM_021094              |
| MU-007611-00         | SLC7A10     | NM_019849              |
| MU-007459-00         | SLC22A8     | NM_004254              |
| MU-007464-01         | SLC24A1     | NM_004727              |
| MU-007560-00         | SLC38A3     | NM_006841              |
| MU-003177-02         | TEC         | NM_003215              |
| MU-006047-01         | TLL2        | NM_012465              |
| MU-003181-01         | TXK         | NM_003328              |
| MU-003182-01         | TYK2        | NM_003331              |
| MU-008585-01         | XDH         | NM_000379              |

| siRNA catalog number | gene symbol | gene accession numbers |
|----------------------|-------------|------------------------|
| MU-003902-01         | SMAD4       | NM_00535               |
| MU-020068-01         | SMAD7       | NM_00590               |
| MU-00354400          | STAT3       | NM_00315               |

Table S2. SiRNAs used in this work. SiRNAs listed on the right side served as controls for my validation assays. SiRNAs listed on the left side target the candidate genes from the genome-wide screening selected for validations.

| Gene name | FW 5'-3'                | RW 5'-3'                   |
|-----------|-------------------------|----------------------------|
| ACE2      | ccagtgatgaaaaagtggg     | gtttcatcatggggcacag        |
| ADORA1    | gtcaagatccctctccggta    | tcccaccacgaaggagag         |
| ALOX15    | agcctgatgggaaactcttg    | aggtggggtgggatcctgt        |
| CHRNE     | gcccagaccgtcttctgt      | accatgacgaaaataaggaacc     |
| CLC       | caacaatgctcctgctacc     | ttgattgtcacagtagaaccagtaga |
| CSF1R     | tctggctctatggcatctc     | gatgccagggtagggttc         |
| CYSLTR1   | actccagtgccagaaagagg    | gcggaagtcatcaatagtgtca     |
| FER       | ggcttaaagcagattccatt    | caaagctccacacgtcactc       |
| GABRA6    | cccgtgtcagatgtggagat    | ccccaaactcaacctctcat       |
| GPLD1     | tccagccccttagcatctta    | gcccctcctgggtgaggt         |
| GRIA4     | gtgggtggctttgatagagttc  | tggcttcagaaaagggtcagc      |
| GRM1      | ctgcaaagctgtgacttgg     | aagatagcgcacaggaatgg       |
| HMGCR     | gttcgggtggcctctagttag   | gcattcgaaaaagcttgacaac     |
| HTR2B     | tgctggaggctcagaataagt   | ttgcatgccagagagtcc         |
| HTR3E     | agctgcacctcttgcataca    | gggttcagctgataaatgg        |
| KDR       | gaacatttggaaatctcttgc   | cggaagaacaatgtagtcttgc     |
| LTB4R2    | gttgttgggtcacctctgc     | cccacctctgcagtgtgta        |
| MMP24     | tctccagggcatccagaa      | gagtgtaggagtggtcctg        |
| MPRG      | cgggaggagtgtctgtct      | cccagttctcaatgggtgt        |
| MYST3     | acaaagcccacgctgaag      | tgtggtgttgcgcttcc          |
| NQO2      | ttgacatcccaggattctacg   | ccgtggttacggaaaggag        |
| OPRK1     | ccttgaaggcaagatcatca    | tgcaaggagcactcaatgac       |
| OSBPL10   | acaccatggaagcccaata     | acctccaccatcaggtgt         |
| OXTR      | ggggagtcaactttaggttcg   | ttcctcgggatgttcagc         |
| P2RY11    | gggaactgggtagcagacac    | agttggcagggcaggact         |
| P2RY12    | tttgcctaacatgattctgacc  | ggaaagacatttctcacttct      |
| PDGFRB    | cccttatcctctcatcatgc    | ccttcctcggatctcgtaa        |
| PLA2G4B   | ggcaacctaccagctaactgaa  | aggtcctggacacctctgc        |
| PLCB3     | ccccaaaaagccaactacag    | ctcctcagtggtcattcacct      |
| PTGER3    | gatccttcttcgaaagtttgc   | tggcagggttaaggaggtg        |
| PTGER4    | ctccctggtggtgctcat      | ggctgatataactggtgacga      |
| PTGIS     | tgaaaagccaggatgaaac     | ggaggttggtatacatggcttc     |
| RARB      | tccgcacactgtctaatc      | gaagcagggttgtacactcg       |
| SLC12A1   | tccgtggaaaattacagatgc   | cgaacttggcggtaactctt       |
| SLC22A8   | tctacccttctgcccctg      | gcagctgaaggactggata        |
| TEC       | gtgtatgaggatgatgagatg   | cagcagatcttcgaaagaagg      |
| TLL2      | catccctacgtcattggag     | catggcctgcttaaaaatgg       |
| TMPRSS2   | cgctggcctactctggaa      | ctgaggagtcgcactctatcc      |
| TRPV5     | ctgtcctcctggagcttgt     | tggggtctgttccagaattt       |
| TYK2      | tggcttctgtgattgacac     | atccccaacgggcttact         |
| XDH       | aacctctcagccctcaaga     | agctcctcctccagagctt        |
| GABRD     | acgggtggagaacaagctca    | ggccacagtggaggtgat         |
| GABRR1    | tgcccacaagcaagtcag      | ggatctatctcagaagctgtt      |
| GLRA1     | aagcggagacatcacaagga    | ccatccataggcagagaag        |
| GRM8      | agcttcatccccatctttt     | gacagtaagtgttgtctggatg     |
| HDAC10    | tgggaagctcctgtacctctt   | ggctggagtggctgtatcc        |
| HDAC3     | gacctatgacaggactgatgagg | gaactcattgggtgcctctg       |

|               |                          |                          |
|---------------|--------------------------|--------------------------|
| MUSK          | cagatatgcaagcggactttc    | tcccacagcacacactc        |
| P2RY2         | gcacctgagaggagaage       | gcattttctgggcaggtag      |
| PLA2G2E       | cacgtgctggtgttccttt      | tcatcaccctaaactgaacc     |
| PLCE1         | gtgactaagggcagcatgttt    | tcaatttccagttaagtctgatga |
| PLCG2         | acccattaaagcagtcacaaac   | atgtcctcgtgtaccatt       |
| PSORS1C2      | ctttgctgcacaccaga        | gcctcctcctcggctcctt      |
| SLC7A10       | ggactacgcctacgtcacaga    | gggggggtacatgatgagga     |
| SLCO1A2       | ggggcatgcaggatatatga     | tggaacaaagcttgatcctctta  |
| HJV           | caccgggaagctcacat        | taggggaagtgggtgtctc      |
| JAK1          | agtgcctgagctacttggga     | cactgtcgattccctcagc      |
| SMAD4         | tggcccaggatcagtaggt      | catcaacaccaattccagca     |
| SMAD7         | cgatggattttctcaaacca     | attcgttccccctgtttca      |
| STAT3         | catatgcggccagcaaaaga     | atacctgctctgaagaaact     |
| TRAF4         | ggaccagcttctctggact      | ggataggcaggccaataact     |
| GAPDH         | catgagaagtatgacaacagcct  | agtcctccacgataccaaaagt   |
| HEPCIDIN      | ctctgtttccacaacagac      | taggggaagtgggtgtctc      |
| mm hepcidin-1 | ataccaatgcagaagagaagg    | aacagataccacactgggaa     |
| mm Rpl19      | aggcatatgggcataggggaagag | ttgaccttcaggtacaggtgtg   |

Table S3. Primers used for quantitative PCR analysis.

## Supplementary Methods

### Cell culture

The Huh7 hepatocarcinoma cell line was cultured in Dulbecco's Modified Eagle's Medium (DMEM, high glucose; Invitrogen, Karlsruhe, Germany) supplemented with 10% heat-inactivated low-endotoxin fetal calf serum (FCS, Invitrogen), and 1% penicillin/streptomycin (PAA, Pasching, Austria).

Murine hepatocytes were isolated from hepatic lobes of male C57Bl/6N mice as described previously.<sup>6</sup> Briefly, liver lobes were perfused first with Liver Perfusion Medium and subsequently with Liver Digest Medium (both from Life Technologies). Perfused lobes were disrupted, the cell suspension was forced through a 100 µm Cell Strainer (Falcon-BD Biosciences), and after a washing step alive cells were separated from debris employing Percoll (GE Healthcare/Sigma) gradient centrifugation. Cells were washed, centrifuged and then plated onto collagen-coated plates (Corning - BioCoat) in William's medium E (Biochrom, Berlin, Germany) containing 100 nM dexamethasone (Sigma Aldrich), 10 µg/ml bovine insulin (Sigma-Aldrich, 1% GlutaMAX (Invitrogen), 10% heat-inactivated low-endotoxin FCS (Invitrogen) and 1% penicillin/streptomycin (PAA). After plating, cells were cultured for five to six hours to allow cell attachment. Afterwards, cells were washed vigorously with PBS and cultured in William's medium E (Biochrom, Berlin, Germany)

containing 1% L-glutamine (GlutaMAX, Invitrogen), 1% penicillin/streptomycin (PAA) and 10% heat-inactivated low-endotoxin FCS (Invitrogen).

Primary human hepatocytes were isolated from human liver tissue samples as described previously<sup>7,8</sup> and delivered overnight on ice, in cell suspension. Upon arrival, cells were washed twice with ice-cold PBS (centrifuged at 4°C, 5 min, 80 g) and then plated in Williams Medium E (Biochrom), containing 1% L-glutamine (GlutaMAX, Invitrogen), 1% penicillin/streptomycin (PAA), 0.8 µg/ml hydrocortisone (Sigma), 15 mM HEPES (Sigma), 1% sodium pyruvate (Invitrogen), 1.6 µg/ml human insulin (Sigma), 1% non-essential amino acids (Invitrogen) and 10% heat-inactivated low-endotoxin FCS (Invitrogen). Alive cells (as assessed by Trypan Blue staining) were plated onto collagen-coated plates (Corning - BioCoat). Seven hours after plating cells were washed with PBS and further cultured in Williams Medium E (Biochrom), containing: 1% L-glutamine (GlutaMAX, Invitrogen), 1% penicillin/streptomycin (PAA) and 10% heat-inactivated low-endotoxin FCS (Invitrogen).

All cell cultures were maintained at 37°C under 5% CO<sub>2</sub>.

### **Pharmaceutical agents**

Drugs used in this study are listed in Supplementary Table 1. Concentrations used in cell culture were as indicated in the table unless stated otherwise. Amiloride hydrochloride hydrate, Captopril, Diclofenac sodium salt, Imatinib Mesylate, Panobinostat, Pentoxifyllin, Ranitidine hydrochloride, Spironolacton, Trapoxin A, Vorinostat and 8-Methoxypsoralen were all prepared in DMSO. Lovastatin and Acetylsalicylic acid were prepared in 100% Ethanol. 3,3'-Methylene-bis (4-hydroxycoumarin) was dissolved in 0.13 M NaOH. The manufacturer's recommendations regarding storage and handling of drugs were followed. Stock solutions of all drugs were stored in aliquots at -20°C.

Amiloride hydrochloride hydrate was kindly provided by the laboratory of Prof. Dr. med. Marcus Mall (MMPU, Heidelberg, Germany). The panHDAC-inhibitors Vorinostat (SAHA), Trapoxin A, Panobinostat (LBH 589), Entinostat (MS-275) and Compound 2 were kindly provided by the laboratory of Prof. Dr. med. Olaf Witt (DKFZ, Heidelberg, Germany).

### **Drug administration in mice**

#### *SAHA*

According to the studies reported in document NDA 21-991 [U.S. Food and Drug Administration (FDA) approval for the use of Vorinostat], the highest single oral dose of the

drug which does not cause significant side effects [the no-observed-adverse-effect-level (NOAEL)] in mice is 2000 mg/kg. In addition, the repeated dose toxicity studies in rats showed that within the first two weeks of treatment with a dose 50 mg/kg/day no weight loss, food consumption alterations or mortality was observed. We thus selected this dose for our experiments.

SAHA was added to the drinking water, as outlined in a study published by Hocly et al.<sup>9</sup> SAHA is difficult to dissolve in aqueous solutions. Thus, as reported in the study above, we increased SAHA solubility by complexing with 2-hydroxypropyl- $\beta$ -cyclodextrin (HOP $\beta$ -CD), a well-known solubilizer of pharmaceuticals.<sup>10</sup> Applying the recommended ratio between SAHA and HOP $\beta$ -CD under the assumption that a mouse drinks approx. 3 ml of water per day, we dissolved 0.34 g SAHA and 9 g of HO $\beta$ -CD per 1 l water.

### *Diclofenac*

According to study 840321 (4.2.3.2.1. eCTD Section), reported in the document NDA 22-122 (FDA approval for the use of Diclofenac), the highest oral dose of the drug which does not cause significant side effects (NOAEL) is 1 mg/kg/day (for 28 days). Based on these data we prepared a solution of the drug (Diclofenac sodium salt; Sigma) in drinking water, in order to obtain the desired dose (under the assumption that a mouse drinks approximately 3 ml water per day). Since solubility of diclofenac is also significantly increased by cyclodextrins,<sup>10</sup> we additionally added the same dose of HO $\beta$ -CD as for SAHA.

As a vehicle control for SAHA and diclofenac, mice administrated with the equal dose of HOP $\beta$ -CD were employed.

### *Imatinib*

Imatinib mesylate is an antineoplastic agent for the treatment of chronic myeloid leukemia (CML) and other malignancies. The addition of 1.13 mM imatinib mesylate to drinking water of 14-week-old mice corresponds approximately to a dose of 75 mg/kg/day.<sup>11</sup> This dose induced biological effects (antiosteolytic activity)<sup>11</sup> and was comparable to a dose that prolonged survival in a murine CML model, without significant side effects.<sup>12</sup> Another study showed that this dose did not cause cardiac toxicity at the 2-week time point.<sup>13</sup> Therefore, we applied the dose of 75 mg/kg/day and we used acidified water (pH 5.5) to prepare solutions. Based on the fact that imatinib solubility is significantly increased by complexing with cyclodextrins,<sup>10</sup> we used HOP $\beta$ -CD (1.1 g/l) as a solubilizing agent.

### *Spironolactone*

In a study by Voelkl et al, spironolactone was dissolved in drinking water at 80 mg/l and prevented pathological calcification.<sup>14</sup> In this study, spironolactone treatment was applied for a life-span without significant adverse effects. Here, we used a two-times higher dose of 160 mg/l water for a 2-week treatment interval. This dose corresponds to approx. 24 mg/kg/day. According to the Material Safety Data Sheet for Aldactone (spironolactone-containing medicine; Pfizer), the lowest-observed-adverse-effect level (LOAEL) dose for oral spironolactone administration in rats is 50 mg/kg/day for 78 weeks and LD50 for a single oral dose is above 1000 mg/kg. Thus, the selected dose is not expected to provoke significant side effects within the treatment period. Based on literature reports,<sup>15</sup> to increase solubility and bioavailability of this drug, we applied HOP $\beta$ -CD, in a molar ratio 1:3 (spironolactone: HOP $\beta$ -CD), in acidified water (pH 5.5).

As a vehicle control for imatinib and spironolactone treatment, mice were administrated an equal HOP $\beta$ -CD dose, in acidified water.

### **Supplementary references**

1. Marimuthu S, Chivukula RS, Alfonso LF, Moridani M, Hagen FK, Bhat GJ. Aspirin acetylates multiple cellular proteins in HCT-116 colon cancer cells: Identification of novel targets. *Int J Oncol*. 2011;39(5):1273-1283.
2. Krennhrubec K, Marshall BL, Hedglin M, Verdin E, Ulrich SM. Design and evaluation of 'Linkerless' hydroxamic acids as selective HDAC8 inhibitors. *Bioorg Med Chem Lett*. 2007;17(10):2874-2878.
3. Di Fazio P, Schneider-Stock R, Neureiter D, et al. The pan-deacetylase inhibitor panobinostat inhibits growth of hepatocellular carcinoma models by alternative pathways of apoptosis. *Cell Oncol*. 2010;32(4):285-300.
4. Sambucetti LC, Fischer DD, Zabludoff S, et al. Histone deacetylase inhibition selectively alters the activity and expression of cell cycle proteins leading to specific chromatin acetylation and antiproliferative effects. *J Biol Chem*. 1999;274(49):34940-34947.
5. Witt O, Monkemeyer S, Ronndahl G, et al. Induction of fetal hemoglobin expression by the histone deacetylase inhibitor apicidin. *Blood*. 2003;101(5):2001-2007.
6. Goncalves LA, Vigario AM, Penha-Goncalves C. Improved isolation of murine hepatocytes for in vitro malaria liver stage studies. *Malar J*. 2007;6:169.



7. Pfeiffer E, Kegel V, Zeilinger K, et al. Featured Article: Isolation, characterization, and cultivation of human hepatocytes and non-parenchymal liver cells. *Exp Biol Med.* 2015;240(5):645-656.
8. Kegel V, Deharde D, Pfeiffer E, Zeilinger K, Seehofer D, Damm G. Protocol for Isolation of Primary Human Hepatocytes and Corresponding Major Populations of Non-parenchymal Liver Cells. *J Vis Exp.* 2016(109):e53069.
9. Hockly E, Richon VM, Woodman B, et al. Suberoylanilide hydroxamic acid, a histone deacetylase inhibitor, ameliorates motor deficits in a mouse model of Huntington's disease. *Proc Natl Acad Sci U S A.* 2003;100(4):2041-2046.
10. Brewster ME, Loftsson T. Cyclodextrins as pharmaceutical solubilizers. *Adv Drug Deliv Rev.* 2007;59(7):645-666.
11. Dewar AL, Farrugia AN, Condina MR, et al. Imatinib as a potential antiresorptive therapy for bone disease. *Blood.* 2006;107(11):4334-4337.
12. Wolff NC, Ilaria RL, Jr. Establishment of a murine model for therapy-treated chronic myelogenous leukemia using the tyrosine kinase inhibitor STI571. *Blood.* 2001;98(9):2808-2816.
13. Kerkela R, Grazette L, Yacobi R, et al. Cardiotoxicity of the cancer therapeutic agent imatinib mesylate. *Nat Med.* 2006;12(8):908-916.
14. Voelkl J, Alesutan I, Leibrock CB, et al. Spironolactone ameliorates PIT1-dependent vascular osteoinduction in klotho-hypomorphic mice. *J Clin Invest.* 2013;123(2):812-822.
15. Yusuff NT, York P, Chrystyn H, et al. Improved bioavailability from a spironolactone beta-cyclodextrin complex. *Eur J Clin Pharmacol.* 1991;40(5):507-511.
