# Supplementary material for: Imatinib and spironolactone suppress hepcidin expression
Source: PubMed Central journal article supplement — Haematologica. 2017 Apr 6;102(7):1173–84. doi: 10.3324/haematol.2016.162917 (PMC5566021; doi:10.3324/haematol.2016.162917), 2017-07
Supplement: 2016_162917-Disclosures_and_Contributions.pdf [file 2016_162917-Disclosures_and_Contributions.pdf]

Haematologica  
HAEMATOL/2016/162917  
Version 3

Imatinib and spironolactone suppress hepcidin expression

Katarzyna Mleczko-Sanecka, Ana Rita da Silva, Debora Call, Joana Neves, Nikolai Schmeer, Georg Damm, Daniel Seehofer, and Martina U. Muckenthaler

Disclosures: The authors declare no competing financial interest.

Contributions: K.M.-S. designed research, performed experiments, analyzed data and wrote the manuscript; A.R.dS. and D.C. performed experiments and analyzed data; J.N. and N.S. performed experiments; G.D. and D.S. provided a critical model system; M.U.M. designed project, supervised research, and wrote the manuscript.
